# Supplementary material for: A Quantitative Tandem Mass Spectrometry and Scaled-Down QuEChERS Approach for Simultaneous Analysis of Pesticide Multiresidues in Human Urine
Source: PubMed Central journal article supplement (PMC6480104; doi:10.3390/molecules24071330), 2019-04-04

Supplementary Material

# A Quantitative Tandem Mass Spectrometry and Scaled-Down QuEChERS Approach for Simultaneous Analysis of Pesticide Multiresidues in Human Urine

Yongho Shin <sup>1,2</sup>, Jiho Lee <sup>1</sup>, Eunyong Park <sup>1</sup>, Junghak Lee <sup>1</sup>, Hye Suk Lee <sup>2,\*</sup> and Jeong-Han Kim <sup>1,\*</sup>

<sup>1</sup> Pesticide Chemistry and Toxicology Laboratory, Department of Agricultural Biotechnology and Research Institute of Agriculture and Life Sciences, Seoul National University, Seoul 08826, Republic of Korea; driger6103@catholic.ac.kr (Y.S.); micai1@snu.ac.kr (J.L.); pey4321@snu.ac.kr (E.P.); crane245@snu.ac.kr (J.L.)

<sup>2</sup> Drug Metabolism and Bioanalysis Laboratory, College of Pharmacy, The Catholic University of Korea, Bucheon-si, Gyeonggi-do 14662, Republic of Korea

\* Correspondence: kjh2404@snu.ac.kr; Tel.: +82-2-880-4644; Fax: +82-2-873-4415 (J.-H.K.); sianalee@catholic.ac.kr; Tel.: +82-2-2164-4061; Fax: +82-32-342-2013 (H.S.L.)

**Table S1.** Recoveries and relative standard deviations (RSDs) of 260 pesticides for three versions of urine preparation methods ( $n = 3$ ).

| No. | Compound name             | Method A             |         | Method B |         | Method C |         |
|-----|---------------------------|----------------------|---------|----------|---------|----------|---------|
|     |                           | RCY <sup>1</sup> (%) | RSD (%) | RCY (%)  | RSD (%) | RCY (%)  | RSD (%) |
| 1   | Acetamidiprid             | 89.2                 | 6.5     | 85.1     | 4.5     | 84.2     | 4.2     |
| 2   | Alachlor                  | 87.7                 | 1.9     | 85.6     | 2.9     | 80.7     | 0.7     |
| 3   | Allidochlor               | 105.7                | 6.3     | 96.0     | 5.9     | 94.4     | 3.7     |
| 4   | Ametoctradin              | 90.0                 | 2.7     | 85.6     | 1.6     | 84.3     | 3.6     |
| 5   | Ametryn                   | 95.4                 | 1.3     | 83.4     | 1.7     | 86.0     | 2.8     |
| 6   | Amisulbrom                | 84.8                 | 0.9     | 100.6    | 4.9     | 70.1     | 11.9    |
| 7   | Anilofos                  | 94.8                 | 1.3     | 86.9     | 1.5     | 82.3     | 1.9     |
| 8   | Asulam                    | 87.4                 | 2.5     | 75.2     | 5.9     | 87.3     | 13.4    |
| 9   | Atrazine                  | 96.7                 | 5.2     | 89.8     | 5.0     | 85.4     | 6.2     |
| 10  | Azaconazole               | 95.3                 | 0.8     | 89.9     | 2.5     | 90.2     | 1.2     |
| 11  | Azamethiphos              | 94.9                 | 3.0     | 82.7     | 3.6     | 85.8     | 6.1     |
| 12  | Azimsulfuron              | 98.2                 | 2.6     | 86.7     | 4.6     | 86.9     | 3.0     |
| 13  | Azinphos-methyl           | 96.0                 | 5.3     | 91.2     | 4.8     | 94.8     | 2.5     |
| 14  | Azoxystrobin              | 89.3                 | 2.5     | 87.0     | 1.4     | 87.7     | 5.8     |
| 15  | Bendiocarb                | 89.9                 | 2.0     | 84.5     | 1.5     | 80.6     | 8.4     |
| 16  | Bensulfuron-methyl        | 92.2                 | 2.1     | 91.9     | 5.4     | 86.7     | 2.4     |
| 17  | Bentazone                 | 93.9                 | 8.1     | 68.8     | 6.7     | 83.1     | 6.3     |
| 18  | Benthiavalicarb-isopropyl | 96.4                 | 3.7     | 92.2     | 0.5     | 82.3     | 5.3     |
| 19  | Benzobicyclon             | 88.1                 | 3.1     | 88.9     | 5.9     | 77.3     | 3.4     |
| 20  | Benzoximate               | 94.2                 | 5.5     | 81.7     | 2.7     | 85.1     | 7.0     |
| 21  | Boscalid                  | 92.4                 | 2.3     | 87.1     | 8.6     | 78.5     | 2.7     |
| 22  | Bromacil                  | 90.9                 | 2.2     | 90.0     | 1.2     | 83.9     | 5.6     |
| 23  | Bromobutide               | 97.1                 | 2.8     | 86.6     | 2.2     | 84.7     | 0.9     |
| 24  | Bupirimate                | 86.4                 | 1.3     | 81.8     | 3.3     | 84.5     | 3.8     |
| 25  | Buprofezin                | 87.5                 | 4.8     | 90.3     | 4.6     | 90.4     | 1.8     |
| 26  | Butachlor                 | 90.8                 | 2.4     | 86.4     | 0.3     | 81.3     | 0.7     |
| 27  | Butafenacil               | 84.1                 | 3.6     | 83.5     | 2.5     | 83.1     | 6.7     |

| No. | Compound name          | Method A             |         | Method B |         | Method C          |         |
|-----|------------------------|----------------------|---------|----------|---------|-------------------|---------|
|     |                        | RCY <sup>1</sup> (%) | RSD (%) | RCY (%)  | RSD (%) | RCY (%)           | RSD (%) |
| 28  | Cadusafos              | 91.1                 | 4.1     | 89.5     | 6.5     | 83.0              | 4.2     |
| 29  | Carbaryl               | 89.9                 | 2.3     | 91.6     | 3.5     | 83.3              | 4.3     |
| 30  | Carbendazim            | 89.0                 | 1.8     | 87.2     | 1.7     | 80.9              | 3.0     |
| 31  | Carbofuran             | 94.2                 | 6.1     | 83.4     | 3.6     | 92.1              | 2.6     |
| 32  | Carbophenothion        | 94.3                 | 1.8     | 86.4     | 4.0     | 89.9              | 0.5     |
| 33  | Carboxin               | 93.1                 | 3.9     | 91.7     | 6.9     | 78.0              | 3.8     |
| 34  | Carpropamid            | 102.6                | 4.1     | 100.3    | 7.8     | 93.4              | 0.4     |
| 35  | Cartap                 | 89.9                 | 8.7     | 80.0     | 8.0     | N.D. <sup>2</sup> | N.D.    |
| 36  | Chlorantraniliprole    | 86.7                 | 2.8     | 93.6     | 6.2     | 89.9              | 3.7     |
| 37  | Chlorfenvinphos        | 91.3                 | 6.6     | 87.2     | 5.2     | 83.3              | 6.7     |
| 38  | Chlorfluazuron         | 89.6                 | 2.6     | 91.6     | 5.0     | 85.3              | 5.5     |
| 39  | Chloridazon            | 91.0                 | 2.4     | 92.4     | 10.2    | 76.9              | 11.9    |
| 40  | Chlorotoluron          | 96.0                 | 1.1     | 86.9     | 5.2     | 83.9              | 2.9     |
| 41  | Chlorsulfuron          | 100.8                | 4.1     | 91.3     | 4.8     | 92.0              | 5.1     |
| 42  | Chromafenozide         | 93.3                 | 8.8     | 89.4     | 5.1     | 83.9              | 9.5     |
| 43  | Cinmethylin            | 97.6                 | 3.6     | 102.8    | 4.6     | 84.4              | 3.2     |
| 44  | Clofentezine           | 103.3                | 1.6     | 87.1     | 3.3     | 89.6              | 3.7     |
| 45  | Clomazone              | 89.7                 | 1.3     | 84.6     | 5.5     | 83.9              | 3.9     |
| 46  | Clothianidin           | 91.0                 | 2.6     | 80.7     | 3.1     | 81.0              | 16.5    |
| 47  | Cyanazine              | 92.2                 | 4.5     | 89.4     | 3.8     | 80.6              | 2.5     |
| 48  | Cyazofamid             | 90.4                 | 3.5     | 91.9     | 5.3     | 90.5              | 6.5     |
| 49  | Cyclosulfamuron        | 86.0                 | 1.1     | 93.2     | 4.9     | 92.2              | 4.5     |
| 50  | Cymoxanil              | 103.2                | 6.4     | 82.1     | 5.9     | 80.4              | 4.9     |
| 51  | Cyproconazole          | 101.7                | 2.4     | 90.6     | 5.8     | 81.6              | 2.1     |
| 52  | Cyprodinil             | 94.7                 | 5.1     | 83.9     | 2.1     | 90.9              | 6.9     |
| 53  | Daimuron               | 94.9                 | 4.7     | 86.2     | 4.2     | 84.2              | 12.6    |
| 54  | Diazinon               | 86.7                 | 2.6     | 92.3     | 3.3     | 86.6              | 3.4     |
| 55  | Dicrotophos            | 90.7                 | 0.3     | 85.6     | 2.2     | 82.9              | 0.8     |
| 56  | Diethofencarb          | 96.3                 | 1.7     | 83.5     | 0.2     | 81.5              | 1.4     |
| 57  | Difenoconazole         | 95.1                 | 1.8     | 87.9     | 3.3     | 86.6              | 4.1     |
| 58  | Diflubenzuron          | 87.0                 | 6.8     | 87.5     | 3.3     | 82.2              | 7.8     |
| 59  | Diflufenican           | 107.2                | 1.0     | 87.5     | 1.3     | 84.0              | 9.1     |
| 60  | Dimethachlor           | 89.1                 | 3.7     | 88.4     | 1.9     | 85.4              | 3.2     |
| 61  | Dimethametryn          | 86.5                 | 3.7     | 80.3     | 4.5     | 80.9              | 4.2     |
| 62  | Dimethenamid           | 90.1                 | 1.5     | 86.4     | 0.8     | 89.9              | 2.3     |
| 63  | Dimethoate             | 91.6                 | 4.3     | 84.7     | 2.6     | 89.7              | 7.9     |
| 64  | Dimethomorph           | 88.5                 | 3.6     | 84.6     | 2.0     | 89.0              | 2.7     |
| 65  | Diniconazole           | 91.5                 | 1.0     | 93.8     | 2.5     | 87.0              | 4.7     |
| 66  | Diphenamid             | 91.7                 | 1.4     | 85.2     | 0.6     | 78.1              | 2.4     |
| 67  | Diuron                 | 94.4                 | 2.3     | 80.4     | 3.1     | 82.2              | 3.4     |
| 68  | Edifenphos             | 87.5                 | 4.3     | 85.5     | 3.7     | 79.2              | 3.6     |
| 69  | Emamectin B1a          | 91.2                 | 1.9     | 86.8     | 1.3     | 83.9              | 1.7     |
| 70  | Emamectin B1b          | 89.9                 | 7.5     | 89.8     | 3.1     | 83.2              | 4.4     |
| 71  | EPN                    | 95.5                 | 5.3     | 84.0     | 3.7     | 83.5              | 4.6     |
| 72  | Epoxiconazole          | 101.3                | 3.4     | 93.3     | 1.9     | 86.2              | 5.5     |
| 73  | Ethaboxam (EBX)        | 89.1                 | 5.9     | 86.5     | 3.4     | 82.8              | 4.8     |
| 74  | Ethametsulfuron-methyl | 89.2                 | 4.4     | 82.3     | 3.2     | 82.3              | 1.7     |
| 75  | Ethiofencarb           | 95.3                 | 1.1     | 81.3     | 5.4     | 86.8              | 1.8     |

| No. | Compound name       | Method A             |         | Method B |         | Method C |         |
|-----|---------------------|----------------------|---------|----------|---------|----------|---------|
|     |                     | RCY <sup>1</sup> (%) | RSD (%) | RCY (%)  | RSD (%) | RCY (%)  | RSD (%) |
| 76  | Ethion              | 90.7                 | 2.3     | 87.5     | 1.4     | 85.2     | 1.4     |
| 77  | Ethoprophos         | 89.2                 | 0.3     | 91.8     | 2.7     | 81.2     | 3.7     |
| 78  | Ethoxyquin          | 88.0                 | 6.5     | 89.7     | 6.7     | 90.0     | 7.3     |
| 79  | Ethoxysulfuron      | 87.4                 | 3.4     | 91.3     | 4.8     | 81.1     | 7.0     |
| 80  | Etoazole            | 82.6                 | 1.6     | 88.2     | 4.3     | 78.7     | 3.5     |
| 81  | Etrimfos            | 87.9                 | 1.5     | 79.3     | 5.4     | 80.8     | 5.6     |
| 82  | Fenamidone          | 91.7                 | 5.2     | 85.0     | 6.3     | 83.4     | 7.7     |
| 83  | Fenamiphos          | 92.6                 | 3.2     | 85.6     | 2.3     | 84.5     | 1.8     |
| 84  | Fenazaquin          | 86.4                 | 0.7     | 89.6     | 2.6     | 86.1     | 3.7     |
| 85  | Fenbuconazole       | 107.3                | 5.9     | 93.5     | 5.9     | 84.6     | 3.6     |
| 86  | Fenhexamid          | 90.3                 | 5.5     | 92.0     | 10.8    | 85.0     | 5.0     |
| 87  | Fenobucarb (BPMC)   | 95.9                 | 2.2     | 85.3     | 0.2     | 84.0     | 5.3     |
| 88  | Fenothiocarb        | 93.3                 | 5.3     | 88.5     | 2.6     | 91.5     | 7.3     |
| 89  | Fenoxanil           | 97.9                 | 2.2     | 91.4     | 1.9     | 89.0     | 2.0     |
| 90  | Fenoxycarb          | 96.0                 | 3.0     | 87.2     | 5.7     | 85.9     | 2.4     |
| 91  | Fenthion            | 96.5                 | 6.3     | 88.9     | 1.4     | 83.9     | 4.1     |
| 92  | Ferimzone           | 83.3                 | 1.4     | 77.4     | 5.5     | 76.5     | 2.9     |
| 93  | Fipronil            | 88.4                 | 4.8     | 93.7     | 1.9     | 89.4     | 2.3     |
| 94  | Fluacrypyrim        | 94.8                 | 3.1     | 78.2     | 2.7     | 85.6     | 3.2     |
| 95  | Fluazinam           | 79.6                 | 2.0     | 83.4     | 3.2     | 91.3     | 6.8     |
| 96  | Flucetosulfuron     | 89.5                 | 5.5     | 93.2     | 2.5     | 88.3     | 2.5     |
| 97  | Flufenacet          | 98.7                 | 2.7     | 92.6     | 3.2     | 83.5     | 8.1     |
| 98  | Flufenoxuron        | 86.4                 | 2.4     | 87.4     | 1.8     | 86.9     | 4.6     |
| 99  | Fluopicolide        | 88.2                 | 7.9     | 96.7     | 4.6     | 87.7     | 11.0    |
| 100 | Fluopyram           | 94.8                 | 2.1     | 99.5     | 4.7     | 85.4     | 6.3     |
| 101 | Flusilazole         | 93.4                 | 1.2     | 87.0     | 4.2     | 86.6     | 2.9     |
| 102 | Flusulfamide        | 96.0                 | 2.5     | 88.2     | 4.0     | 84.6     | 4.9     |
| 103 | Flutolanil          | 89.1                 | 1.6     | 76.7     | 4.3     | 88.3     | 4.5     |
| 104 | Fluxapyroxad        | 102.4                | 7.5     | 121.0    | 8.8     | 83.2     | 4.6     |
| 105 | Fonofos             | 100.8                | 0.9     | 94.6     | 4.0     | 96.4     | 2.9     |
| 106 | Forchlorfenuron     | 84.0                 | 5.1     | 84.3     | 1.4     | 85.4     | 3.1     |
| 107 | Fosthiazate         | 88.7                 | 1.1     | 85.3     | 3.4     | 83.5     | 3.2     |
| 108 | Furathiocarb        | 91.8                 | 3.7     | 83.3     | 3.2     | 81.8     | 1.4     |
| 109 | Halosulfuron-methyl | 87.6                 | 4.7     | 89.1     | 3.0     | 90.5     | 1.4     |
| 110 | Haloxyfop-R-Methyl  | 96.3                 | 3.4     | 95.6     | 4.3     | 84.8     | 6.0     |
| 111 | Hexaconazole        | 97.4                 | 4.6     | 88.8     | 0.6     | 85.0     | 4.3     |
| 112 | Hexaflumuron        | 85.0                 | 13.0    | 82.0     | 4.5     | 82.4     | 4.2     |
| 113 | Hexazinone          | 89.0                 | 5.8     | 86.6     | 5.0     | 81.0     | 2.6     |
| 114 | Imazalil            | 96.3                 | 7.4     | 90.7     | 5.5     | 79.5     | 7.7     |
| 115 | Imazapic            | 56.1                 | 1.3     | 49.4     | 6.3     | 82.7     | 1.6     |
| 116 | Imazaquin           | 89.0                 | 3.3     | 73.9     | 2.1     | 81.4     | 8.5     |
| 117 | Imazethapyr         | 74.2                 | 9.7     | 77.5     | 8.0     | 72.7     | 2.2     |
| 118 | Imibenconazole      | 94.5                 | 2.3     | 96.8     | 2.6     | 86.7     | 3.0     |
| 119 | Imicyafos           | 84.5                 | 6.0     | 90.8     | 11.6    | 99.3     | 12.8    |
| 120 | Imidacloprid        | 86.1                 | 2.5     | 85.9     | 5.1     | 83.8     | 3.3     |
| 121 | Indoxacarb          | 84.3                 | 5.6     | 82.5     | 8.8     | 83.0     | 6.1     |
| 122 | Iprobenfos          | 89.5                 | 2.4     | 83.3     | 4.8     | 81.0     | 4.9     |
| 123 | Iprovalicarb        | 87.9                 | 4.7     | 87.6     | 5.9     | 88.4     | 2.5     |

| No. | Compound name      | Method A             |         | Method B |         | Method C |         |
|-----|--------------------|----------------------|---------|----------|---------|----------|---------|
|     |                    | RCY <sup>1</sup> (%) | RSD (%) | RCY (%)  | RSD (%) | RCY (%)  | RSD (%) |
| 124 | Isazofos           | 87.3                 | 2.1     | 87.4     | 2.8     | 87.0     | 4.4     |
| 125 | Isoprocarb         | 104.8                | 4.7     | 90.8     | 3.1     | 85.5     | 1.3     |
| 126 | Isoprothiolane     | 86.9                 | 5.4     | 85.5     | 2.0     | 91.7     | 3.8     |
| 127 | Isoproturon        | 92.2                 | 4.6     | 86.8     | 4.7     | 86.2     | 2.2     |
| 128 | Isopyrazam         | 82.9                 | 4.1     | 87.8     | 3.3     | 86.5     | 3.0     |
| 129 | Isoxathion         | 87.3                 | 3.6     | 93.0     | 2.9     | 86.0     | 4.2     |
| 130 | Kresoxim-methyl    | 84.6                 | 8.0     | 80.8     | 10.8    | 83.6     | 3.0     |
| 131 | Linuron            | 96.8                 | 5.8     | 92.3     | 4.7     | 84.0     | 0.9     |
| 132 | Mandipropamid      | 84.8                 | 2.4     | 86.5     | 4.9     | 90.6     | 7.7     |
| 133 | Mecarbam           | 90.7                 | 4.8     | 88.0     | 6.0     | 81.7     | 6.6     |
| 134 | Mefenacet          | 89.2                 | 5.7     | 85.5     | 2.6     | 84.3     | 5.4     |
| 135 | Mefenpyr-diethyl   | 100.5                | 4.0     | 88.3     | 2.1     | 90.2     | 0.9     |
| 136 | Mepronil           | 94.1                 | 8.2     | 90.5     | 4.4     | 84.4     | 4.9     |
| 137 | Metalaxyl          | 91.8                 | 0.6     | 85.2     | 2.3     | 85.3     | 2.6     |
| 138 | Metamifop          | 90.3                 | 2.6     | 93.0     | 4.6     | 87.8     | 2.6     |
| 139 | Metazosulfuron     | 91.7                 | 7.7     | 89.2     | 1.4     | 82.1     | 6.1     |
| 140 | Metconazole        | 97.8                 | 2.0     | 85.5     | 3.9     | 90.8     | 3.8     |
| 141 | Methabenzthiazuron | 91.9                 | 4.5     | 88.3     | 4.6     | 82.0     | 4.5     |
| 142 | Methidathion       | 87.9                 | 2.6     | 79.7     | 8.6     | 84.0     | 4.9     |
| 143 | Methiocarb         | 99.2                 | 2.4     | 90.4     | 5.2     | 83.9     | 4.8     |
| 144 | Methomyl           | 98.2                 | 4.0     | 76.2     | 10.7    | 88.7     | 1.5     |
| 145 | Methoxyfenozide    | 89.2                 | 9.8     | 87.8     | 4.7     | 91.7     | 4.2     |
| 146 | Metobromuron       | 102.7                | 8.6     | 80.2     | 5.5     | 84.9     | 4.7     |
| 147 | Metolachlor        | 88.6                 | 2.6     | 85.9     | 1.3     | 85.2     | 0.6     |
| 148 | Metolcarb          | 111.1                | 4.1     | 81.6     | 3.7     | 87.5     | 2.4     |
| 149 | Metominostrobin    | 101.7                | 4.0     | 89.0     | 2.1     | 82.3     | 3.4     |
| 150 | Metrafenone        | 96.3                 | 2.5     | 87.5     | 2.8     | 89.7     | 2.7     |
| 151 | Mevinphos          | 91.8                 | 1.7     | 87.9     | 9.5     | 82.3     | 1.2     |
| 152 | Milbemectin A4     | 102.4                | 2.6     | 86.1     | 1.3     | 75.8     | 1.7     |
| 153 | Molinate           | 88.2                 | 2.1     | 87.2     | 5.3     | 84.7     | 8.2     |
| 154 | Monocrotophos      | 90.1                 | 0.4     | 83.6     | 5.3     | 81.2     | 5.9     |
| 155 | Myclobutanil       | 100.8                | 7.8     | 95.2     | 4.2     | 81.5     | 4.0     |
| 156 | Napropamide        | 98.3                 | 4.5     | 85.7     | 2.7     | 77.0     | 4.6     |
| 157 | Nicosulfuron       | 79.3                 | 3.3     | 84.0     | 2.5     | 86.8     | 2.8     |
| 158 | Nitenpyram         | 63.1                 | 2.8     | 66.4     | 15.4    | 74.5     | 3.9     |
| 159 | Nuarimol           | 92.8                 | 6.3     | 87.8     | 8.8     | 84.4     | 9.0     |
| 160 | Ofurace            | 86.2                 | 1.9     | 85.4     | 7.8     | 92.4     | 5.2     |
| 161 | Omethoate          | 73.0                 | 7.4     | 83.8     | 3.4     | 89.6     | 7.3     |
| 162 | Orysastrobin       | 103.8                | 8.4     | 90.1     | 1.8     | 90.0     | 6.7     |
| 163 | Oxadiazon          | 103.2                | 2.5     | 84.1     | 2.3     | 88.2     | 1.4     |
| 164 | Oxadixyl           | 89.0                 | 4.1     | 84.4     | 0.8     | 81.1     | 4.2     |
| 165 | Oxamyl             | 85.7                 | 2.0     | 84.3     | 4.3     | 88.5     | 1.0     |
| 166 | Oxydemeton-methyl  | 74.1                 | 1.4     | 80.5     | 4.3     | 80.6     | 3.9     |
| 167 | Paclobutrazol      | 99.3                 | 4.9     | 82.7     | 2.8     | 84.0     | 3.1     |
| 168 | Pebulate           | 98.8                 | 4.9     | 83.3     | 5.6     | 87.7     | 0.9     |
| 169 | Penconazole        | 92.2                 | 1.9     | 87.0     | 3.1     | 81.5     | 2.2     |
| 170 | Pendimethalin      | 93.3                 | 2.9     | 91.9     | 1.5     | 87.8     | 4.7     |
| 171 | Penoxsulam         | 93.2                 | 3.5     | 88.3     | 0.6     | 81.8     | 4.9     |

| No. | Compound name        | Method A             |         | Method B |         | Method C |         |
|-----|----------------------|----------------------|---------|----------|---------|----------|---------|
|     |                      | RCY <sup>1</sup> (%) | RSD (%) | RCY (%)  | RSD (%) | RCY (%)  | RSD (%) |
| 172 | Penthiopyrad         | 97.4                 | 0.5     | 86.8     | 7.0     | 86.4     | 0.7     |
| 173 | Phenmedipham         | 92.1                 | 5.3     | 84.1     | 4.6     | 86.5     | 4.1     |
| 174 | Phenthoate           | 90.3                 | 2.9     | 80.7     | 2.9     | 82.8     | 5.3     |
| 175 | Phosalone            | 90.6                 | 2.6     | 92.5     | 2.4     | 89.5     | 0.8     |
| 176 | Phosmet              | 90.2                 | 1.7     | 85.1     | 3.7     | 89.0     | 3.1     |
| 177 | Phosphamidon         | 90.0                 | 6.2     | 86.5     | 2.4     | 82.5     | 1.2     |
| 178 | Phoxim               | 108.7                | 1.3     | 84.6     | 3.9     | 81.7     | 3.1     |
| 179 | Picolinafen          | 89.3                 | 3.0     | 90.3     | 2.0     | 85.3     | 2.3     |
| 180 | Picoxystrobin        | 92.1                 | 4.9     | 87.9     | 3.5     | 85.7     | 6.0     |
| 181 | Piperophos           | 93.6                 | 1.8     | 85.5     | 5.1     | 79.6     | 5.6     |
| 182 | Pirimicarb           | 88.8                 | 1.3     | 86.5     | 4.6     | 82.9     | 3.5     |
| 183 | Pirimiphos-ethyl     | 95.7                 | 3.1     | 85.9     | 2.3     | 84.5     | 1.0     |
| 184 | Pirimiphos-methyl    | 95.1                 | 3.1     | 87.7     | 3.9     | 83.2     | 6.7     |
| 185 | Pretilachlor         | 95.7                 | 0.7     | 92.0     | 3.0     | 92.0     | 0.9     |
| 186 | Probenazole          | 105.4                | 3.7     | 89.3     | 2.9     | 82.6     | 7.1     |
| 187 | Prochloraz           | 91.3                 | 3.0     | 88.6     | 4.5     | 88.2     | 5.0     |
| 188 | Promecarb            | 97.6                 | 3.1     | 93.4     | 3.3     | 84.6     | 1.2     |
| 189 | Prometryn            | 88.2                 | 1.5     | 83.5     | 4.8     | 79.1     | 8.8     |
| 190 | Propachlor           | 100.6                | 4.0     | 93.5     | 5.1     | 80.4     | 2.0     |
| 191 | Propazine            | 99.4                 | 5.1     | 85.3     | 6.4     | 86.4     | 3.3     |
| 192 | Propiconazole        | 89.5                 | 2.5     | 93.0     | 1.0     | 85.1     | 1.9     |
| 193 | Propisochlor         | 94.5                 | 4.4     | 85.6     | 2.1     | 89.5     | 5.2     |
| 194 | Propoxur             | 93.3                 | 2.0     | 87.3     | 8.0     | 84.2     | 7.1     |
| 195 | Prothiofos           | 104.8                | 4.1     | 95.0     | 4.5     | 88.2     | 5.6     |
| 196 | Pyraclofos           | 105.7                | 5.9     | 83.5     | 6.1     | 79.7     | 6.6     |
| 197 | Pyraclostrobin       | 89.8                 | 2.3     | 88.2     | 3.2     | 85.5     | 5.8     |
| 198 | Pyrazolynate         | 93.2                 | 4.9     | 96.4     | 7.1     | 82.4     | 1.9     |
| 199 | Pyrazophos           | 95.5                 | 4.0     | 83.4     | 7.0     | 84.5     | 8.1     |
| 200 | Pyrazoxyfen          | 91.1                 | 0.6     | 97.7     | 0.7     | 92.3     | 4.4     |
| 201 | Pyribenzoxim         | 82.6                 | 2.2     | 86.4     | 6.8     | 76.2     | 6.6     |
| 202 | Pyributicarb         | 94.8                 | 1.3     | 84.7     | 1.0     | 82.3     | 2.3     |
| 203 | Pyridaben            | 95.1                 | 2.9     | 84.5     | 5.1     | 82.3     | 2.1     |
| 204 | Pyridalyl            | 91.6                 | 1.4     | 86.0     | 0.3     | 86.1     | 1.8     |
| 205 | Pyridaphenthion      | 90.4                 | 7.1     | 85.9     | 5.0     | 86.4     | 3.5     |
| 206 | Pyridate             | 95.3                 | 2.9     | 81.5     | 2.8     | 83.2     | 1.6     |
| 207 | Pyrifenoxy           | 103.1                | 3.8     | 85.0     | 1.4     | 87.0     | 4.8     |
| 208 | Pyriminobac-methyl E | 87.9                 | 4.0     | 87.8     | 2.4     | 84.8     | 1.0     |
| 209 | Pyriminobac-methyl Z | 96.2                 | 4.3     | 88.0     | 4.0     | 82.3     | 2.9     |
| 210 | Pyrimisulfan         | 84.0                 | 9.0     | 105.8    | 8.6     | 91.5     | 12.7    |
| 211 | Pyriproxyfen         | 87.3                 | 3.1     | 90.5     | 3.2     | 90.9     | 0.8     |
| 212 | Pyroquilon           | 94.8                 | 3.5     | 83.0     | 4.2     | 85.7     | 1.5     |
| 213 | Quinoclamine         | 91.9                 | 3.6     | 87.1     | 0.7     | 72.6     | 21.3    |
| 214 | Rimsulfuron          | 93.6                 | 4.0     | 79.6     | 3.0     | 85.2     | 1.6     |
| 215 | Saflufenacil         | 84.2                 | 4.0     | 86.6     | 4.0     | 86.8     | 6.2     |
| 216 | Sethoxydim           | 92.8                 | 1.4     | 83.9     | 4.0     | 79.9     | 1.8     |
| 217 | Simazine             | 101.7                | 1.0     | 89.2     | 4.7     | 92.4     | 5.4     |
| 218 | Simeconazole         | 83.3                 | 2.5     | 88.8     | 3.9     | 79.8     | 5.5     |
| 219 | Simetryn             | 92.7                 | 1.9     | 84.4     | 3.6     | 79.9     | 3.3     |

| No. | Compound name          | Method A             |         | Method B |         | Method C |         |
|-----|------------------------|----------------------|---------|----------|---------|----------|---------|
|     |                        | RCY <sup>1</sup> (%) | RSD (%) | RCY (%)  | RSD (%) | RCY (%)  | RSD (%) |
| 220 | Spinetoram (XDE-175-J) | 93.7                 | 1.8     | 93.2     | 7.1     | 85.3     | 5.6     |
| 221 | Spinosyn A             | 89.2                 | 4.4     | 80.6     | 3.0     | 81.0     | 1.7     |
| 222 | Spinosyn D             | 93.7                 | 1.7     | 88.7     | 4.1     | 85.9     | 0.9     |
| 223 | Spirodiclofen          | 92.0                 | 2.6     | 86.0     | 3.5     | 86.0     | 2.9     |
| 224 | Sulfoxaflor            | 85.9                 | 2.7     | 87.8     | 5.1     | 91.4     | 17.7    |
| 225 | Sulprofos              | 92.2                 | 0.5     | 86.4     | 2.7     | 82.6     | 2.0     |
| 226 | TCMTB                  | 99.3                 | 6.1     | 93.7     | 8.4     | 83.0     | 10.0    |
| 227 | Tebuconazole           | 96.0                 | 5.0     | 84.7     | 5.4     | 84.1     | 5.5     |
| 228 | Tebufenozide           | 101.8                | 2.1     | 91.4     | 7.9     | 81.4     | 1.1     |
| 229 | Tebupirimfos           | 93.3                 | 1.9     | 91.2     | 4.0     | 91.6     | 2.2     |
| 230 | Terbuthylazine         | 98.4                 | 5.2     | 90.0     | 4.6     | 84.7     | 2.5     |
| 231 | Terbutryn              | 98.8                 | 9.0     | 82.1     | 1.6     | 84.5     | 3.9     |
| 232 | Tetrachlorvinphos      | 94.5                 | 1.4     | 92.2     | 2.1     | 86.9     | 7.2     |
| 233 | Tetraconazole          | 88.9                 | 3.2     | 90.4     | 5.1     | 83.2     | 6.5     |
| 234 | Thenylchlor            | 91.8                 | 1.2     | 83.2     | 3.4     | 86.4     | 4.8     |
| 235 | Thiabendazole          | 92.0                 | 6.2     | 85.0     | 4.3     | 79.8     | 11.0    |
| 236 | Thiacloprid            | 86.4                 | 4.1     | 89.4     | 1.9     | 80.7     | 9.4     |
| 237 | Thiazopyr              | 89.8                 | 6.5     | 85.3     | 4.2     | 87.3     | 9.3     |
| 238 | Thidiazuron            | 86.3                 | 1.5     | 87.7     | 2.8     | 81.8     | 4.2     |
| 239 | Thifensulfuron-methyl  | 88.1                 | 4.7     | 83.8     | 3.4     | 87.7     | 3.3     |
| 240 | Thiobencarb            | 95.0                 | 3.1     | 93.5     | 4.4     | 88.9     | 4.3     |
| 241 | Thiodicarb             | 89.3                 | 2.3     | 88.6     | 4.2     | 84.4     | 3.9     |
| 242 | Thiophanate-methyl     | 96.2                 | 2.3     | 97.2     | 3.4     | 84.2     | 2.1     |
| 243 | Tolfenpyrad            | 84.4                 | 0.3     | 87.7     | 3.8     | 84.3     | 2.1     |
| 244 | Triadimefon            | 96.8                 | 8.0     | 91.5     | 5.2     | 86.0     | 9.3     |
| 245 | Triadimenol            | 100.7                | 12.6    | 87.5     | 8.1     | 81.0     | 10.8    |
| 246 | Tri-allate             | 97.7                 | 3.2     | 92.8     | 3.5     | 90.2     | 5.7     |
| 247 | Triazophos             | 89.7                 | 5.6     | 88.7     | 5.2     | 86.3     | 9.7     |
| 248 | Tribenuron-methyl      | 97.0                 | 2.9     | 87.6     | 4.1     | 84.8     | 1.7     |
| 249 | Tribufos               | 89.9                 | 1.3     | 88.9     | 3.5     | 89.8     | 5.3     |
| 250 | Trichlorfon            | 102.8                | 2.7     | 86.9     | 4.1     | 91.5     | 1.9     |
| 251 | Tricyclazole           | 84.7                 | 2.2     | 86.1     | 6.6     | 86.4     | 5.0     |
| 252 | Trifloxystrobin        | 94.0                 | 5.6     | 83.1     | 4.4     | 78.6     | 3.3     |
| 253 | Triflumizole           | 94.1                 | 2.1     | 90.4     | 1.9     | 87.2     | 3.1     |
| 254 | Triflumuron            | 96.3                 | 5.5     | 89.6     | 5.7     | 83.8     | 4.1     |
| 255 | Trimethacarb           | 96.1                 | 1.3     | 85.1     | 5.4     | 85.4     | 2.8     |
| 256 | Triticonazole          | 92.6                 | 2.8     | 86.9     | 3.2     | 88.4     | 1.3     |
| 257 | Uniconazole            | 96.1                 | 6.8     | 82.4     | 2.7     | 86.5     | 2.5     |
| 258 | Vamidothion            | 88.1                 | 3.5     | 81.8     | 4.7     | 82.4     | 5.3     |
| 259 | XMC                    | 89.9                 | 1.4     | 87.9     | 4.6     | 85.3     | 1.0     |
| 260 | Zoxamide               | 95.1                 | 1.4     | 85.5     | 1.7     | 84.0     | 6.4     |

<sup>1</sup> Recovery.<sup>2</sup> Not determined.

**Table S2.** Relative area intensities<sup>1</sup> (100 at solvent standard peak area) of 260 pesticides for three versions of urine preparation methods.

| No. | Compound name             | Method A     |              | Method B     |              | Method C          |              |
|-----|---------------------------|--------------|--------------|--------------|--------------|-------------------|--------------|
|     |                           | 100<br>ng/mL | 250<br>ng/mL | 100<br>ng/mL | 250<br>ng/mL | 100<br>ng/mL      | 250<br>ng/mL |
| 1   | Acetamiprid               | 64.8         | 72.5         | 55.7         | 55.7         | 30.4              | 31.4         |
| 2   | Alachlor                  | 108.9        | 113.7        | 95.9         | 95.4         | 90.3              | 104.6        |
| 3   | Allidochlor               | 78.1         | 72.6         | 69.2         | 64.8         | 51.5              | 44.7         |
| 4   | Ametoctradin              | 101.3        | 92.7         | 82.4         | 92.2         | 89.1              | 89.8         |
| 5   | Ametryn                   | 89.6         | 80.2         | 88.8         | 81.3         | 79.0              | 80.1         |
| 6   | Amisulbrom                | 94.7         | 109.6        | 97.4         | 78.4         | 84.4              | 89.0         |
| 7   | Anilofos                  | 105.2        | 94.7         | 100.8        | 96.4         | 91.1              | 99.5         |
| 8   | Asulam                    | 50.9         | 62.3         | 27.7         | 40.1         | 16.4              | 19.3         |
| 9   | Atrazine                  | 86.2         | 92.1         | 80.3         | 79.2         | 62.6              | 67.5         |
| 10  | Azaconazole               | 86.5         | 71.0         | 68.5         | 66.5         | 68.6              | 58.8         |
| 11  | Azamethiphos              | 56.7         | 60.6         | 47.3         | 44.3         | 38.0              | 32.5         |
| 12  | Azimsulfuron              | 105.2        | 89.3         | 88.8         | 91.8         | 91.7              | 91.5         |
| 13  | Azinphos-methyl           | 79.6         | 94.3         | 77.5         | 85.5         | 58.0              | 69.5         |
| 14  | Azoxystrobin              | 92.5         | 92.9         | 77.6         | 85.4         | 73.6              | 74.0         |
| 15  | Bendiocarb                | 61.5         | 69.9         | 48.3         | 59.2         | 36.4              | 47.5         |
| 16  | Bensulfuron-methyl        | 130.1        | 106.9        | 97.8         | 84.0         | 93.7              | 83.7         |
| 17  | Bentazone                 | 84.4         | 95.8         | 53.2         | 79.6         | 31.4              | 42.4         |
| 18  | Benthiavalicarb-isopropyl | 108.3        | 83.2         | 99.1         | 69.6         | 98.1              | 76.2         |
| 19  | Benzobicyclon             | 97.0         | 85.5         | 78.2         | 71.3         | 84.0              | 69.3         |
| 20  | Benzoximate               | 85.9         | 91.6         | 106.8        | 94.6         | 98.2              | 90.7         |
| 21  | Boscalid                  | 104.8        | 109.3        | 98.7         | 93.3         | 82.4              | 85.8         |
| 22  | Bromacil                  | 61.0         | 72.0         | 49.9         | 60.4         | 37.4              | 48.6         |
| 23  | Bromobutide               | 89.5         | 98.9         | 91.1         | 103.1        | 92.6              | 89.6         |
| 24  | Bupirimate                | 92.6         | 94.4         | 72.6         | 86.1         | 74.7              | 75.5         |
| 25  | Buprofezin                | 111.9        | 107.6        | 95.8         | 96.1         | 100.7             | 93.8         |
| 26  | Butachlor                 | 104.8        | 104.0        | 99.1         | 98.6         | 96.1              | 109.0        |
| 27  | Butafenacil               | 113.4        | 114.6        | 97.1         | 99.3         | 113.6             | 99.3         |
| 28  | Cadusafos                 | 91.6         | 97.9         | 96.5         | 86.3         | 104.7             | 82.1         |
| 29  | Carbaryl                  | 60.3         | 73.9         | 52.5         | 55.5         | 40.0              | 41.3         |
| 30  | Carbendazim               | 71.2         | 73.5         | 50.0         | 54.9         | 57.5              | 55.0         |
| 31  | Carbofuran                | 85.5         | 86.8         | 66.8         | 80.0         | 59.4              | 60.3         |
| 32  | Carbophenothion           | 114.9        | 108.9        | 109.9        | 99.0         | 109.2             | 98.6         |
| 33  | Carboxin                  | 64.9         | 73.6         | 57.6         | 58.6         | 49.2              | 48.7         |
| 34  | Carpropamid               | 97.8         | 78.5         | 76.8         | 66.8         | 78.1              | 68.7         |
| 35  | Cartap                    | 100.1        | 81.4         | 73.5         | 79.6         | N.D. <sup>2</sup> | N.D.         |
| 36  | Chlorantraniliprole       | 84.4         | 89.8         | 70.1         | 69.2         | 62.4              | 64.2         |
| 37  | Chlorfenvinphos           | 82.2         | 108.7        | 85.2         | 92.1         | 73.8              | 100.2        |
| 38  | Chlorfluazuron            | 120.4        | 108.8        | 102.7        | 106.5        | 103.9             | 107.0        |
| 39  | Chloridazon               | 42.1         | 41.1         | 27.7         | 29.1         | 17.0              | 15.1         |
| 40  | Chlorotoluron             | 57.1         | 60.5         | 47.9         | 47.7         | 40.6              | 43.4         |
| 41  | Chlorsulfuron             | 123.2        | 120.8        | 110.4        | 102.8        | 105.0             | 90.8         |
| 42  | Chromafenozide            | 86.0         | 81.6         | 110.5        | 91.5         | 82.4              | 84.8         |

| No. | Compound name          | Method A |       | Method B |       | Method C |       |
|-----|------------------------|----------|-------|----------|-------|----------|-------|
|     |                        | 100      | 250   | 100      | 250   | 100      | 250   |
|     |                        | ng/mL    | ng/mL | ng/mL    | ng/mL | ng/mL    | ng/mL |
| 43  | Cinmethylin            | 79.4     | 93.4  | 96.3     | 101.1 | 94.6     | 110.4 |
| 44  | Clofentezine           | 119.6    | 112.1 | 108.4    | 123.5 | 108.5    | 116.2 |
| 45  | Clomazone              | 88.3     | 97.8  | 75.9     | 76.0  | 57.4     | 64.5  |
| 46  | Clothianidin           | 44.3     | 59.0  | 45.4     | 48.1  | 27.7     | 25.4  |
| 47  | Cyanazine              | 86.7     | 88.6  | 66.5     | 60.0  | 58.4     | 57.4  |
| 48  | Cyazofamid             | 118.1    | 113.4 | 99.7     | 102.4 | 105.2    | 104.7 |
| 49  | Cyclosulfamuron        | 103.8    | 99.8  | 77.0     | 78.7  | 78.5     | 71.7  |
| 50  | Cymoxanil              | 55.9     | 54.4  | 37.6     | 39.3  | 23.3     | 26.8  |
| 51  | Cyproconazole          | 97.5     | 83.6  | 95.5     | 80.7  | 88.1     | 88.8  |
| 52  | Cyprodinil             | 99.2     | 97.9  | 79.6     | 83.6  | 93.1     | 70.3  |
| 53  | Daimuron               | 91.8     | 97.5  | 81.0     | 87.1  | 68.5     | 84.2  |
| 54  | Diazinon               | 113.9    | 108.4 | 98.3     | 101.5 | 118.8    | 103.5 |
| 55  | Dicrotophos            | 90.5     | 79.6  | 71.9     | 71.3  | 44.8     | 41.3  |
| 56  | Diethofencarb          | 95.0     | 83.9  | 90.4     | 81.7  | 77.7     | 73.3  |
| 57  | Difenoconazole         | 118.9    | 115.8 | 115.6    | 114.5 | 121.3    | 115.1 |
| 58  | Diflubenzuron          | 109.2    | 129.2 | 95.0     | 113.1 | 88.5     | 102.9 |
| 59  | Diflufenican           | 98.3     | 81.6  | 85.7     | 86.2  | 85.3     | 82.3  |
| 60  | Dimethachlor           | 97.0     | 101.6 | 79.1     | 82.3  | 69.6     | 68.3  |
| 61  | Dimethametryn          | 106.5    | 101.2 | 87.9     | 89.8  | 84.4     | 90.4  |
| 62  | Dimethenamid           | 83.6     | 89.8  | 69.8     | 82.9  | 72.0     | 64.4  |
| 63  | Dimethoate             | 57.2     | 62.8  | 52.1     | 53.0  | 28.6     | 25.8  |
| 64  | Dimethomorph           | 137.5    | 127.4 | 108.9    | 112.5 | 100.9    | 87.1  |
| 65  | Diniconazole           | 109.9    | 116.6 | 116.7    | 107.3 | 114.3    | 114.8 |
| 66  | Diphenamid             | 91.4     | 80.8  | 78.9     | 79.0  | 72.5     | 72.4  |
| 67  | Diuron                 | 79.3     | 86.4  | 63.2     | 76.6  | 57.1     | 66.3  |
| 68  | Edifenphos             | 113.5    | 122.8 | 121.2    | 98.0  | 107.9    | 112.8 |
| 69  | Emamectin B1a          | 118.1    | 123.2 | 123.2    | 112.2 | 119.2    | 115.0 |
| 70  | Emamectin B1b          | 119.6    | 132.6 | 132.5    | 116.6 | 114.5    | 137.5 |
| 71  | EPN                    | 84.5     | 93.2  | 81.7     | 74.3  | 66.7     | 73.0  |
| 72  | Epoxiconazole          | 108.3    | 99.2  | 106.2    | 100.4 | 103.4    | 110.8 |
| 73  | Ethaboxam (EBX)        | 82.1     | 100.2 | 80.8     | 86.0  | 64.3     | 80.8  |
| 74  | Ethametsulfuron-methyl | 105.9    | 117.3 | 92.1     | 96.5  | 80.7     | 83.3  |
| 75  | Ethiofencarb           | 67.5     | 70.0  | 62.1     | 64.0  | 53.1     | 50.3  |
| 76  | Ethion                 | 111.6    | 110.0 | 107.8    | 96.0  | 99.5     | 104.4 |
| 77  | Ethoprophos            | 100.5    | 92.8  | 76.1     | 85.4  | 77.5     | 81.1  |
| 78  | Ethoxyquin             | 107.6    | 94.3  | 75.5     | 80.9  | 70.5     | 70.6  |
| 79  | Ethoxysulfuron         | 148.8    | 142.9 | 121.4    | 111.9 | 122.5    | 130.5 |
| 80  | Etoxazole              | 94.0     | 103.8 | 88.9     | 75.8  | 88.6     | 84.8  |
| 81  | Etrimfos               | 94.9     | 107.0 | 107.4    | 102.6 | 100.5    | 98.7  |
| 82  | Fenamidone             | 110.6    | 110.9 | 84.6     | 91.7  | 76.2     | 74.2  |
| 83  | Fenamiphos             | 113.2    | 109.6 | 101.0    | 96.5  | 95.3     | 89.3  |
| 84  | Fenazaquin             | 106.2    | 107.6 | 91.5     | 84.8  | 87.6     | 86.2  |
| 85  | Fenbuconazole          | 99.7     | 92.7  | 94.1     | 106.7 | 90.9     | 111.3 |
| 86  | Fenhexamid             | 122.0    | 114.0 | 112.8    | 110.1 | 115.9    | 103.4 |



| No. | Compound name       | Method A |       | Method B |       | Method C |       |
|-----|---------------------|----------|-------|----------|-------|----------|-------|
|     |                     | 100      | 250   | 100      | 250   | 100      | 250   |
|     |                     | ng/mL    | ng/mL | ng/mL    | ng/mL | ng/mL    | ng/mL |
| 87  | Fenobucarb (BPMC)   | 95.4     | 92.4  | 72.3     | 79.0  | 66.1     | 73.4  |
| 88  | Fenothiocarb        | 90.6     | 92.4  | 87.5     | 89.8  | 70.2     | 73.3  |
| 89  | Fenoxanil           | 94.7     | 91.5  | 89.9     | 87.0  | 78.3     | 77.4  |
| 90  | Fenoxycarb          | 98.3     | 83.1  | 80.7     | 81.9  | 80.9     | 89.3  |
| 91  | Fenthion            | 109.7    | 102.9 | 100.2    | 100.8 | 98.8     | 111.0 |
| 92  | Ferimzone           | 89.4     | 100.9 | 75.8     | 79.0  | 58.5     | 61.0  |
| 93  | Fipronil            | 129.4    | 115.6 | 125.8    | 118.0 | 145.1    | 126.6 |
| 94  | Fluacrypyrim        | 88.0     | 85.9  | 98.6     | 106.6 | 95.3     | 92.4  |
| 95  | Fluazinam           | 110.3    | 116.8 | 114.1    | 108.6 | 113.5    | 109.5 |
| 96  | Flucetosulfuron     | 180.7    | 179.8 | 133.4    | 133.9 | 131.9    | 147.6 |
| 97  | Flufenacet          | 75.0     | 83.2  | 82.3     | 86.3  | 74.2     | 96.0  |
| 98  | Flufenoxuron        | 107.9    | 117.8 | 99.7     | 101.9 | 103.9    | 106.8 |
| 99  | Fluopicolide        | 97.6     | 128.1 | 80.6     | 88.1  | 73.5     | 83.0  |
| 100 | Fluopyram           | 84.7     | 88.0  | 83.0     | 73.3  | 77.3     | 82.8  |
| 101 | Flusilazole         | 106.6    | 103.5 | 100.3    | 99.5  | 82.9     | 90.0  |
| 102 | Flusulfamide        | 102.3    | 119.7 | 114.6    | 121.7 | 109.7    | 133.9 |
| 103 | Flutolanil          | 112.6    | 91.5  | 92.2     | 78.3  | 77.5     | 71.0  |
| 104 | Fluxapyroxad        | 102.7    | 91.2  | 88.8     | 60.9  | 68.9     | 66.1  |
| 105 | Fonofos             | 114.3    | 101.2 | 117.2    | 100.3 | 114.0    | 90.3  |
| 106 | Forchlorfenuron     | 95.7     | 98.5  | 86.4     | 85.9  | 80.2     | 79.7  |
| 107 | Fosthiazate         | 73.0     | 69.6  | 62.1     | 58.5  | 50.9     | 51.7  |
| 108 | Furathiocarb        | 95.1     | 98.7  | 89.9     | 95.8  | 97.5     | 101.2 |
| 109 | Halosulfuron-methyl | 143.6    | 124.5 | 123.3    | 112.4 | 123.6    | 123.3 |
| 110 | Haloxypop-R-Methyl  | 111.0    | 110.4 | 99.5     | 104.1 | 95.3     | 111.7 |
| 111 | Hexaconazole        | 99.4     | 114.5 | 111.5    | 106.3 | 102.3    | 111.9 |
| 112 | Hexaflumuron        | 94.1     | 103.2 | 126.4    | 124.5 | 117.7    | 113.8 |
| 113 | Hexazinone          | 70.8     | 84.8  | 58.7     | 62.7  | 48.0     | 52.8  |
| 114 | Imazalil            | 94.8     | 73.4  | 76.2     | 66.2  | 68.1     | 60.0  |
| 115 | Imazapic            | 58.3     | 63.7  | 36.6     | 41.8  | 29.3     | 29.0  |
| 116 | Imazaquin           | 85.6     | 87.8  | 70.6     | 81.4  | 66.0     | 75.4  |
| 117 | Imazethapyr         | 61.2     | 55.2  | 41.3     | 42.0  | 39.8     | 35.1  |
| 118 | Imibenconazole      | 110.2    | 99.3  | 111.7    | 91.8  | 100.5    | 95.8  |
| 119 | Imicyafos           | 64.6     | 85.3  | 57.6     | 55.4  | 41.4     | 37.5  |
| 120 | Imidacloprid        | 76.7     | 72.9  | 66.1     | 51.9  | 32.4     | 30.4  |
| 121 | Indoxacarb          | 101.9    | 100.5 | 93.7     | 100.3 | 97.3     | 101.2 |
| 122 | Iprobenfos          | 86.6     | 86.6  | 65.4     | 67.2  | 57.2     | 64.1  |
| 123 | Iprovalicarb        | 97.6     | 99.7  | 91.7     | 89.8  | 90.8     | 77.6  |
| 124 | Isazofos            | 102.7    | 105.4 | 79.5     | 88.9  | 88.7     | 76.9  |
| 125 | Isoproc carb        | 72.9     | 61.4  | 58.8     | 59.0  | 50.2     | 54.4  |
| 126 | Isoprothiolane      | 105.7    | 100.7 | 73.1     | 84.0  | 76.5     | 74.5  |
| 127 | Isoproturon         | 89.0     | 94.3  | 82.7     | 83.3  | 66.2     | 70.5  |
| 128 | Isopyrazam          | 92.9     | 110.1 | 92.0     | 84.9  | 88.9     | 82.3  |
| 129 | Isoxathion          | 99.0     | 119.6 | 99.9     | 99.7  | 91.4     | 103.6 |
| 130 | Kresoxim-methyl     | 90.2     | 97.6  | 73.7     | 77.7  | 69.7     | 75.7  |

| No. | Compound name      | Method A     |              | Method B     |              | Method C     |              |
|-----|--------------------|--------------|--------------|--------------|--------------|--------------|--------------|
|     |                    | 100<br>ng/mL | 250<br>ng/mL | 100<br>ng/mL | 250<br>ng/mL | 100<br>ng/mL | 250<br>ng/mL |
| 131 | Linuron            | 81.9         | 82.3         | 89.3         | 79.8         | 61.7         | 76.1         |
| 132 | Mandipropamid      | 98.2         | 92.2         | 71.4         | 77.8         | 70.2         | 66.4         |
| 133 | Mecarbam           | 90.5         | 96.9         | 109.3        | 98.8         | 94.5         | 112.9        |
| 134 | Mefenacet          | 102.0        | 109.9        | 83.0         | 90.7         | 96.1         | 79.5         |
| 135 | Mefenpyr-diethyl   | 92.9         | 72.6         | 83.0         | 82.1         | 92.4         | 74.4         |
| 136 | Mepronil           | 96.4         | 103.9        | 76.2         | 88.6         | 70.8         | 79.7         |
| 137 | Metalaxyl          | 89.4         | 85.6         | 66.5         | 73.7         | 64.9         | 64.2         |
| 138 | Metamifop          | 110.7        | 104.2        | 118.0        | 96.4         | 116.7        | 107.1        |
| 139 | Metazosulfuron     | 162.4        | 141.4        | 157.3        | 130.8        | 139.4        | 134.4        |
| 140 | Metconazole        | 109.6        | 109.4        | 103.8        | 111.1        | 104.7        | 96.8         |
| 141 | Methabenzthiazuron | 71.2         | 70.0         | 58.5         | 63.4         | 58.6         | 54.0         |
| 142 | Methidathion       | 83.0         | 86.5         | 82.7         | 93.6         | 79.5         | 70.8         |
| 143 | Methiocarb         | 83.0         | 80.2         | 79.6         | 66.9         | 64.5         | 63.1         |
| 144 | Methomyl           | 50.3         | 49.6         | 36.7         | 38.5         | 13.9         | 16.4         |
| 145 | Methoxyfenozide    | 88.4         | 63.0         | 62.7         | 62.5         | 64.4         | 57.7         |
| 146 | Metobromuron       | 63.3         | 50.3         | 48.8         | 50.6         | 34.3         | 42.7         |
| 147 | Metolachlor        | 92.7         | 89.0         | 83.9         | 74.7         | 73.9         | 71.1         |
| 148 | Metolcarb          | 69.0         | 67.4         | 50.5         | 65.0         | 39.7         | 45.8         |
| 149 | Metominostrobin    | 80.2         | 94.8         | 60.4         | 81.3         | 62.1         | 77.7         |
| 150 | Metrafenone        | 118.2        | 109.5        | 119.1        | 114.3        | 122.0        | 96.5         |
| 151 | Mevinphos          | 68.5         | 66.2         | 46.8         | 40.0         | 27.7         | 26.3         |
| 152 | Milbemectin A4     | 116.6        | 108.0        | 117.8        | 116.4        | 147.0        | 115.6        |
| 153 | Molinate           | 107.8        | 119.4        | 102.3        | 105.7        | 97.1         | 104.7        |
| 154 | Monocrotophos      | 60.1         | 65.4         | 47.1         | 52.0         | 23.7         | 26.9         |
| 155 | Myclobutanil       | 133.0        | 94.1         | 122.6        | 98.0         | 104.5        | 110.2        |
| 156 | Napropamide        | 87.3         | 90.9         | 84.4         | 78.0         | 80.2         | 87.0         |
| 157 | Nicosulfuron       | 86.7         | 93.4         | 63.9         | 66.5         | 53.4         | 58.0         |
| 158 | Nitenpyram         | 132.4        | 136.2        | 60.4         | 54.6         | 30.6         | 25.5         |
| 159 | Nuarimol           | 106.6        | 103.1        | 103.4        | 101.7        | 79.4         | 90.2         |
| 160 | Ofurace            | 69.4         | 74.2         | 54.2         | 59.8         | 44.2         | 40.9         |
| 161 | Omethoate          | 40.8         | 45.3         | 33.3         | 34.6         | 19.9         | 17.2         |
| 162 | Oryastrobin        | 94.9         | 88.0         | 101.4        | 89.7         | 89.3         | 92.2         |
| 163 | Oxadiazon          | 109.7        | 116.0        | 112.6        | 120.1        | 111.0        | 104.4        |
| 164 | Oxadixyl           | 51.1         | 54.5         | 33.6         | 36.3         | 22.1         | 26.6         |
| 165 | Oxamyl             | 56.7         | 51.7         | 44.3         | 43.0         | 16.9         | 17.7         |
| 166 | Oxydemeton-methyl  | 56.3         | 63.8         | 50.6         | 47.6         | 26.5         | 27.7         |
| 167 | Paclobutrazol      | 101.4        | 81.6         | 85.5         | 82.9         | 62.3         | 78.7         |
| 168 | Pebulate           | 119.0        | 111.0        | 103.0        | 124.9        | 114.9        | 104.8        |
| 169 | Penconazole        | 87.2         | 114.6        | 90.8         | 101.8        | 90.1         | 104.7        |
| 170 | Pendimethalin      | 98.3         | 109.4        | 100.6        | 100.1        | 94.8         | 97.8         |
| 171 | Penoxsulam         | 122.4        | 117.6        | 114.7        | 102.7        | 82.4         | 89.2         |
| 172 | Penthiopyrad       | 113.7        | 95.1         | 89.2         | 93.8         | 84.2         | 90.0         |
| 173 | Phenmedipham       | 89.1         | 96.9         | 76.2         | 82.1         | 67.9         | 68.7         |
| 174 | Phenthoate         | 89.1         | 107.7        | 84.0         | 93.0         | 69.2         | 80.3         |

| No. | Compound name        | Method A |       | Method B |       | Method C |       |
|-----|----------------------|----------|-------|----------|-------|----------|-------|
|     |                      | 100      | 250   | 100      | 250   | 100      | 250   |
|     |                      | ng/mL    | ng/mL | ng/mL    | ng/mL | ng/mL    | ng/mL |
| 175 | Phosalone            | 110.0    | 123.1 | 120.9    | 110.0 | 101.9    | 111.5 |
| 176 | Phosmet              | 83.8     | 106.0 | 84.3     | 92.8  | 65.5     | 72.1  |
| 177 | Phosphamidon         | 77.3     | 81.1  | 60.4     | 64.3  | 48.2     | 52.2  |
| 178 | Phoxim               | 106.0    | 98.6  | 93.8     | 97.8  | 95.3     | 106.8 |
| 179 | Picolinafen          | 111.6    | 119.2 | 113.5    | 113.5 | 121.4    | 111.5 |
| 180 | Picoxystrobin        | 86.0     | 92.3  | 96.9     | 84.3  | 90.7     | 88.2  |
| 181 | Piperophos           | 107.3    | 111.9 | 101.4    | 102.1 | 112.0    | 104.9 |
| 182 | Pirimicarb           | 81.1     | 88.7  | 64.8     | 69.8  | 52.6     | 56.8  |
| 183 | Pirimiphos-ethyl     | 103.3    | 100.4 | 101.3    | 102.1 | 111.7    | 103.8 |
| 184 | Pirimiphos-methyl    | 103.1    | 106.9 | 92.8     | 113.6 | 95.1     | 106.8 |
| 185 | Pretilachlor         | 107.0    | 103.2 | 105.1    | 95.4  | 105.4    | 96.2  |
| 186 | Probenazole          | 54.1     | 51.2  | 39.6     | 40.0  | 26.9     | 28.8  |
| 187 | Prochloraz           | 104.6    | 110.1 | 111.5    | 100.0 | 110.5    | 95.0  |
| 188 | Promecarb            | 89.5     | 90.0  | 81.5     | 72.4  | 69.4     | 67.8  |
| 189 | Prometryn            | 100.2    | 103.5 | 86.3     | 82.8  | 72.9     | 82.3  |
| 190 | Propachlor           | 84.5     | 83.8  | 71.5     | 70.1  | 66.9     | 73.0  |
| 191 | Propazine            | 84.7     | 90.6  | 82.6     | 83.0  | 63.3     | 68.0  |
| 192 | Propiconazole        | 108.1    | 121.1 | 115.2    | 108.2 | 125.7    | 117.1 |
| 193 | Propisochlor         | 101.7    | 107.6 | 95.4     | 93.8  | 94.4     | 97.2  |
| 194 | Propoxur             | 59.1     | 65.8  | 56.0     | 53.9  | 38.2     | 40.3  |
| 195 | Prothiofos           | 106.3    | 106.2 | 106.6    | 115.2 | 105.7    | 99.3  |
| 196 | Pyraclufos           | 93.6     | 84.4  | 89.2     | 90.7  | 83.9     | 97.9  |
| 197 | Pyraclostrobin       | 114.0    | 105.7 | 107.3    | 96.7  | 99.6     | 90.8  |
| 198 | Pyrazolynate         | 95.8     | 85.7  | 87.3     | 69.2  | 86.5     | 75.8  |
| 199 | Pyrazophos           | 103.6    | 98.1  | 99.6     | 91.5  | 103.6    | 93.8  |
| 200 | Pyrazoxyfen          | 98.7     | 95.9  | 101.9    | 81.6  | 93.2     | 84.1  |
| 201 | Pyribenzoxim         | 105.7    | 99.1  | 85.2     | 79.5  | 82.7     | 92.9  |
| 202 | Pyributicarb         | 85.5     | 94.5  | 93.5     | 95.1  | 99.3     | 93.6  |
| 203 | Pyridaben            | 90.4     | 90.6  | 88.6     | 90.5  | 81.9     | 80.9  |
| 204 | Pyridalyl            | 124.1    | 116.4 | 110.5    | 109.6 | 102.1    | 103.3 |
| 205 | Pyridaphenthion      | 95.5     | 83.0  | 77.7     | 74.5  | 64.0     | 71.9  |
| 206 | Pyridate             | 103.3    | 103.9 | 104.8    | 100.1 | 110.4    | 97.5  |
| 207 | Pyrifenox            | 86.6     | 80.6  | 75.3     | 83.8  | 74.8     | 74.2  |
| 208 | Pyriminobac-methyl E | 98.2     | 91.5  | 84.9     | 88.8  | 94.5     | 81.0  |
| 209 | Pyriminobac-methyl Z | 93.9     | 86.2  | 86.1     | 74.8  | 83.6     | 79.0  |
| 210 | Pyrimisulfan         | 93.2     | 109.9 | 78.2     | 71.2  | 73.6     | 60.5  |
| 211 | Pyriproxyfen         | 87.9     | 95.9  | 91.6     | 95.5  | 101.7    | 86.7  |
| 212 | Pyroquilon           | 60.2     | 73.7  | 56.5     | 60.1  | 31.6     | 45.5  |
| 213 | Quinoclamine         | 50.7     | 48.4  | 40.9     | 43.2  | 38.8     | 34.9  |
| 214 | Rimsulfuron          | 104.0    | 109.0 | 93.3     | 99.2  | 87.3     | 78.1  |
| 215 | Saflufenacil         | 184.2    | 184.4 | 141.0    | 160.2 | 138.4    | 134.6 |
| 216 | Sethoxydim           | 84.5     | 84.6  | 74.1     | 80.2  | 90.3     | 78.6  |
| 217 | Simazine             | 64.7     | 57.9  | 48.9     | 50.2  | 39.4     | 40.0  |
| 218 | Simeconazole         | 91.9     | 111.4 | 110.7    | 103.8 | 100.6    | 107.4 |

| No. | Compound name          | Method A |       | Method B |       | Method C |       |
|-----|------------------------|----------|-------|----------|-------|----------|-------|
|     |                        | 100      | 250   | 100      | 250   | 100      | 250   |
|     |                        | ng/mL    | ng/mL | ng/mL    | ng/mL | ng/mL    | ng/mL |
| 219 | Simetryn               | 76.1     | 83.4  | 67.7     | 75.5  | 63.2     | 67.6  |
| 220 | Spinetoram (XDE-175-J) | 97.9     | 102.0 | 81.0     | 96.8  | 98.3     | 106.5 |
| 221 | Spinosyn A             | 97.3     | 86.5  | 91.0     | 84.3  | 93.8     | 91.4  |
| 222 | Spinosyn D             | 116.6    | 111.0 | 109.7    | 103.0 | 99.3     | 105.8 |
| 223 | Spirodiclofen          | 92.1     | 101.4 | 92.3     | 94.3  | 93.2     | 99.5  |
| 224 | Sulfoxaflor            | 38.3     | 50.5  | 38.9     | 42.4  | 19.5     | 20.8  |
| 225 | Sulprofos              | 97.4     | 109.2 | 112.4    | 97.9  | 103.0    | 101.5 |
| 226 | TCMTB                  | 96.9     | 94.2  | 102.7    | 85.8  | 77.8     | 83.2  |
| 227 | Tebuconazole           | 106.4    | 98.4  | 92.6     | 103.0 | 93.3     | 105.7 |
| 228 | Tebufenozide           | 77.7     | 83.2  | 81.0     | 94.3  | 94.8     | 84.8  |
| 229 | Tebupirimfos           | 92.5     | 94.0  | 81.4     | 94.0  | 79.6     | 81.0  |
| 230 | Terbutylazine          | 86.4     | 81.7  | 70.2     | 67.7  | 59.5     | 59.7  |
| 231 | Terbutryn              | 90.5     | 81.5  | 82.0     | 82.5  | 85.8     | 76.0  |
| 232 | Tetrachlorvinphos      | 100.7    | 103.0 | 101.1    | 102.6 | 92.6     | 96.0  |
| 233 | Tetraconazole          | 90.5     | 99.0  | 97.6     | 99.5  | 97.0     | 96.8  |
| 234 | Thenylchlor            | 87.7     | 96.7  | 94.0     | 99.5  | 85.8     | 97.6  |
| 235 | Thiabendazole          | 46.2     | 50.2  | 42.9     | 38.5  | 24.2     | 20.1  |
| 236 | Thiacloprid            | 45.5     | 45.5  | 26.3     | 24.0  | 18.4     | 17.5  |
| 237 | Thiazopyr              | 101.8    | 112.0 | 98.5     | 101.1 | 108.4    | 103.1 |
| 238 | Thidiazuron            | 114.2    | 111.4 | 83.5     | 89.0  | 74.2     | 75.4  |
| 239 | Thifensulfuron-methyl  | 99.9     | 90.7  | 72.0     | 80.3  | 63.4     | 62.9  |
| 240 | Thiobencarb            | 119.5    | 116.8 | 105.9    | 99.7  | 115.2    | 93.6  |
| 241 | Thiodicarb             | 88.5     | 89.3  | 78.7     | 78.5  | 69.7     | 68.8  |
| 242 | Thiophanate-methyl     | 51.7     | 51.6  | 34.4     | 35.8  | 26.7     | 30.6  |
| 243 | Tolfenpyrad            | 113.3    | 132.1 | 106.4    | 102.2 | 109.3    | 112.3 |
| 244 | Triadimefon            | 124.0    | 109.0 | 116.0    | 93.1  | 92.5     | 91.5  |
| 245 | Triadimenol            | 136.5    | 112.7 | 125.9    | 130.7 | 122.7    | 121.3 |
| 246 | Tri-allate             | 115.7    | 121.8 | 121.4    | 105.7 | 108.5    | 117.2 |
| 247 | Triazophos             | 101.7    | 101.5 | 80.6     | 93.0  | 91.4     | 85.2  |
| 248 | Tribenuron-methyl      | 86.7     | 73.3  | 58.9     | 54.5  | 56.5     | 54.3  |
| 249 | Tribufos               | 95.6     | 110.0 | 98.3     | 97.5  | 96.1     | 82.4  |
| 250 | Trichlorfon            | 67.2     | 71.9  | 58.2     | 60.9  | 32.1     | 36.2  |
| 251 | Tricyclazole           | 40.3     | 43.1  | 28.9     | 29.4  | 17.6     | 17.6  |
| 252 | Trifloxystrobin        | 99.2     | 91.3  | 86.5     | 87.9  | 102.0    | 88.8  |
| 253 | Triflumizole           | 85.6     | 95.1  | 82.7     | 84.1  | 86.6     | 84.2  |
| 254 | Triflumuron            | 122.0    | 106.6 | 99.6     | 106.3 | 107.8    | 112.5 |
| 255 | Trimethacarb           | 90.6     | 97.5  | 85.2     | 86.0  | 69.2     | 70.4  |
| 256 | Triticonazole          | 104.7    | 90.8  | 97.8     | 94.9  | 158.8    | 152.5 |
| 257 | Uniconazole            | 100.3    | 97.0  | 97.3     | 93.1  | 140.4    | 155.3 |
| 258 | Vamidothion            | 71.5     | 82.4  | 54.6     | 60.7  | 34.9     | 35.2  |
| 259 | XMC                    | 75.0     | 93.1  | 71.8     | 73.1  | 14.2     | 14.8  |
| 260 | Zoxamide               | 115.3    | 108.5 | 107.5    | 106.4 | 44.4     | 44.0  |

$$^1 \text{ Relative peak intensity} = \left( \frac{\text{Peak area of post spiked sample}}{\text{Peak area of solvent standard}} \right) \times 100.$$

<sup>2</sup> Not determined.

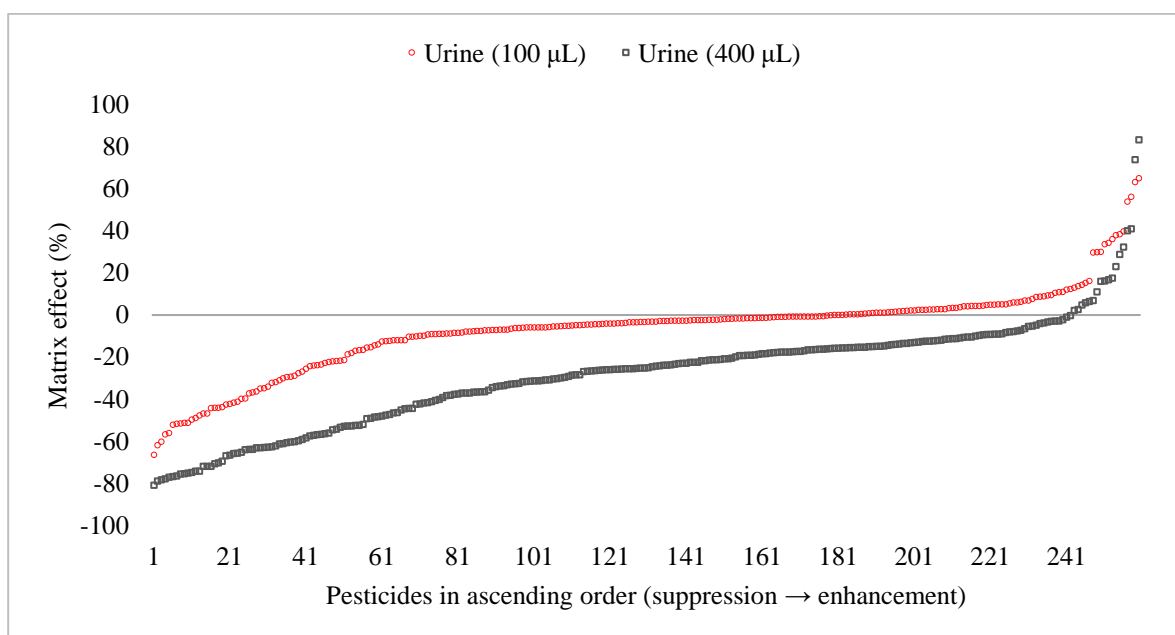

**Figure S1.** Matrix effects of 260 pesticides in 100  $\mu\text{L}$  and 400  $\mu\text{L}$  of urine samples. The samples were extracted with the same volumes of solvent (400  $\mu\text{L}$ ). Each graph was plotted against the number of pesticides ranked by matrix effect values (%).

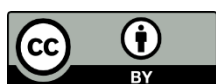

Supplement: molecules-24-01330-s001.pdf [file molecules-24-01330-s001.pdf]
